# Supplementary material for: Simultaneous neutron reflectometry and infrared reflection absorption spectroscopy (IRRAS) study of mixed monolayer reactions at the air–water interface
Source: Royal Society of Chemistry journal article supplement (doi:10.1039/c7ra04900e), 2017-01-01
Supplement: c7ra04900e1.pdf [file c7ra04900e1.pdf]

### Experimental supporting information (ESI)

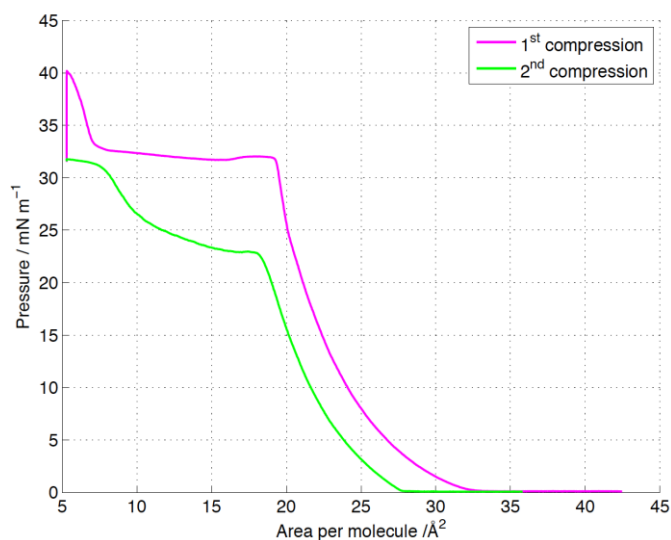

Figure S.1 shows the pressure–area isotherm of the mixture hOA–hSA (1:1 mol). A shift on the second compression suggests loss of molecules. The shape of the first isotherm up to 32 mN m<sup>-1</sup> is similar to the pure hOA film, and then a first small drop of the pressure is recorded before the pressure stays constant until 7 Å<sup>2</sup>. Upon further compression, a steep increase and then a drop is recorded, this is a feature related to hSA. The second compression shows different features, which could be due to the presence of collapsed structures, which do not re-equilibrate during expansion.
